# Supplementary material for: Machine learning-based identification of genetic interactions from heterogeneous gene expression profiles
Source: PubMed Central journal article supplement (PMC6062065; doi:10.1371/journal.pone.0201056), 2018-07-26

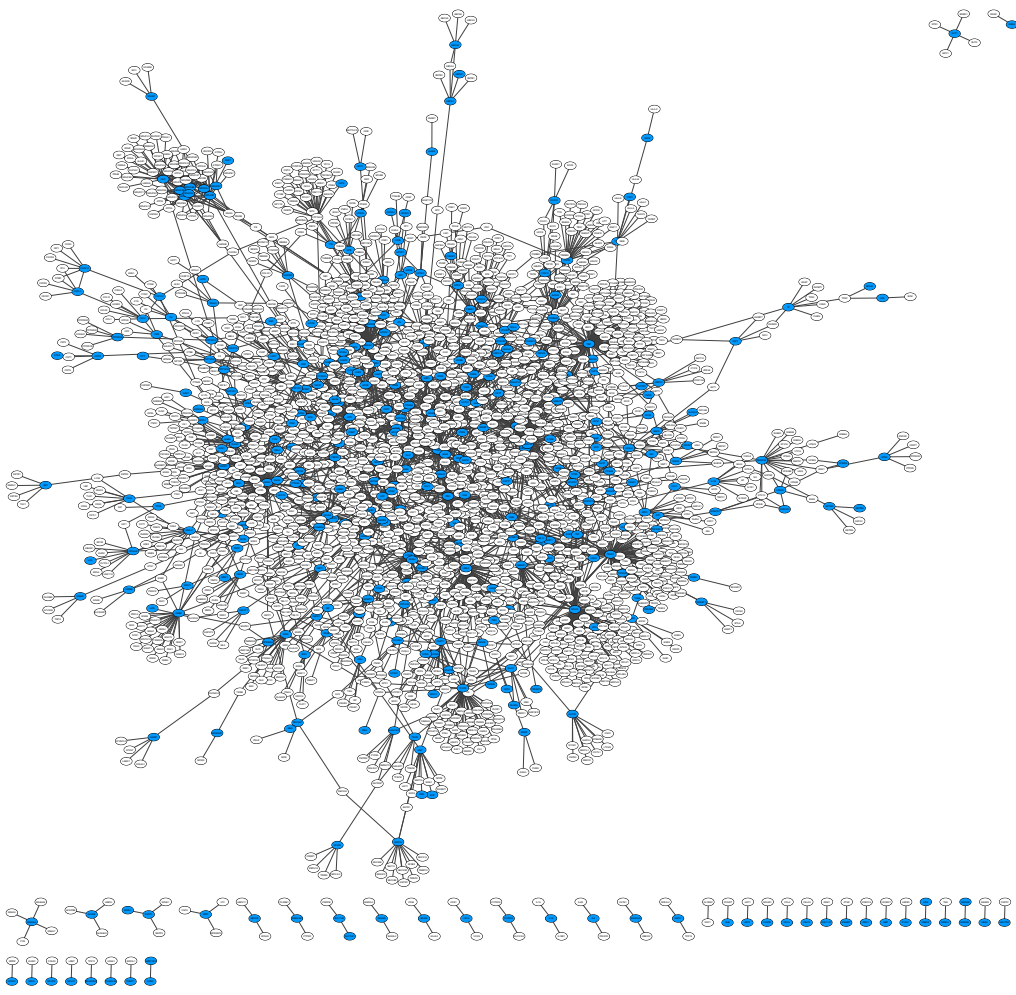

Supplement: pone.0201056.s001.pdf [file pone.0201056.s001.pdf]
